# Supplementary material
Source: Research Square preprint supplement (doi:10.21203/rs.3.rs-9025253/v1)
Supplement: Supplementary file 1 [file 24711d4164617534076338bd.docx]

| Supplementary Table 1. List of primer sequences used for detecting different *kdr* mutations | | | |
| --- | --- | --- | --- |
| *kdr* mutations | **Primers names** | **Primers sequence** | **Reference** |
| F1534C | BF41_c1534-f | GCG TAC CTG TGT CTG TTC CA | Saingamsook et al. [44] |
| BF42_c1534-r | GGC TTC TTC GAG CCC ATC TT |
| BF43_Ae1534F-r | GCG TGA AGA ACG ACC CGA |
| BF44_Ae1534C-f | CCT CTA CTT TGT GTT CTT CAT CAT CTG |
| V1016I | BF54_Val1016f | GCG GGC AGG GCG GCG GGG GCG GG GCC ACA AAT TGT TTC CCA CCC GCA CCG G | Saavedra et al. [71] |
| BF55_Iso1016f | GCG GGC ACA AAT TGT TTC CCA CCC GCA CTG A |
| BF56_Iso1016r | GGA TGA ACC GAA ATT GGA CAA AAG C |
| S989P | BF69_M1-For | AAT GAT ATT AAC AAA ATT GCG C | Li et al. [43] 2015 |
| BF70_M1-Rev | GCA CGC CTC TAA TAT TGA TGC |
| BF71_M1-S | GCG GCG AGT GGA TCG AAT |
| BF72_M1-P | GCG GCG AGT GGA TCG AAC |
| V1016G | BF73_M2-For | GCC ACC GTA GTG ATA GGA AAT C |
| BF74_M2-Rev | CGG GTT AAG TTT CGT TTA GTA GC |
| BF75_M2-V | GTT TCC CAC TCG CAC AGG T |
| BF76_M2-G | GTT TCC CAC TCG CAC AGG G |
| V410L | BF103: PM1_Ext_419F | GAT TCC TCC AGA ACT CCA CC | Granada et al. [45] |
| BF104: PM1_Ext_419R | TCA ATG GAT TTG GGT GAC AA |
| BF105: PM1_F_419Wt | CTT GGG TTC GTT CTA CCT TG |
| BF106: PM1_F_419Mut | CTT GGG TTC GTT CTA CCT TT |
