# Supplementary material
Source: Research Square preprint supplement (doi:10.21203/rs.3.rs-9025253/v1)
Supplement: Supplementary file 2 [file 2b902c5dae062a4eb90865fd.docx]

| **Supplementary Table 3. Generalized linear model showing the mortality rate of the pyrethroids only between 2021 and 2022 in Abidjan.** | | | |
| --- | --- | --- | --- |
| Predictor | Odds Ratio | 95% CI | p-value |
| **Intercept** | **0.38** | **0.24 - 0.55** | **<0.001** |
| Year [2021] |  |  |  |
| 2022 | 1.42 | 0.87 - 2.33 | 0.156 |
| **Insecticide [Deltamethrin]** |  |  |  |
| **Alphacypermethrin** | **0.52** | **0.36 - 0.77** | **<0.001** |
| **Permethrin** | **0.63** | **0.44 - 0.96** | **0.018** |
| **Locality [Anono]** |  |  |  |
| Ayakro | 1.01 | 0.65 - 1.55 | 0.970 |
| Entente | 0.69 | 0.43 - 1.10 | 0.111 |
| Gbagba | 1.03 | 0.67 - 1.55 | 0.891 |
| **Year [2021] x insecticide [Deltamethrin]** |  |  |  |
| 2022 x Alphacypermethrin | 0.74 | 0.44 - 1.25 | 0.258 |
| 2022 x Permethrin | 0.71 | 0.43 - 1.18 | 0.187 |
| **Year [2021] x locality [Anono]** |  |  |  |
| 2022 x Ayakro | 1.16 | 0.64 - 2.11 | 0.626 |
| **2022 x Entente** | **1.87** | **1.02 - 3.46** | **0.041** |
| 2022 x Gbagba | 1.30 | 0.72 - 2.35 | 0.381 |
| Reference factor levels of predictors are shown in brackets with the Odds Ratio, 95% confidence intervals (CI), and associated probabilities for predictors included in the model. Significant predictor terms are shown in bold. | | | |
