# Supplementary material
Source: Research Square preprint supplement (doi:10.21203/rs.3.rs-9025253/v1)
Supplement: Supplementary file 3 [file 2d28db0fd7e55d8123ea808b.docx]

| **Supplementary Table 7. Generalized linear model showing the genotypes of *Ae. aegypti* to pyrethroids**. | | | |
| --- | --- | --- | --- |
| **Predictor** | **Odds Ratio** | **95% CI** | **p-value** |
| Intercept | 2.73 | 1.30 - 5.73 | 0.008 |
| Insecticide [Deltamethrin] |  |  |  |
| **Alphacypermethrin** | **0.32** | **0.19 - 0.55** | **<0.001** |
| **Permethrin** | **0.36** | **0.21 - 0.62** | **<0.001** |
| Genotypes [VV/VV] |  |  |  |
| **II/LL** | **0.08** | **0.02 - 0.29** | **<0.001** |
| **II/VL** | **0.16** | **0.06 - 0.42** | **<0.001** |
| **II/VV** | **0.15** | **0.05 - 0.47** | **0.001** |
| **VI/LL** | **0.13** | **0.04 - 0.36** | **<0.001** |
| **VI/VL** | **0.26** | **0.11 - 0.57** | **0.002** |
| **VI/VV** | **0.30** | **0.13 - 0.70** | **0.005** |
| VV/LL | 0.00 | - | 0.989 |
| **VV/VL** | **0.20** | **0.08 - 0.54** | **0.001** |
| Reference factor levels of predictors are shown in brackets with the Odds Ratio, 95% confidence intervals (CI), and associated probabilities for predictors included in the model. Significant predictor terms are shown in bold. | | | |
