# Supplementary material
Source: Research Square preprint supplement (doi:10.21203/rs.3.rs-9025253/v1)
Supplement: Supplementary file 4 [file 5ff17e961dcf7b4289d897c0.docx]

| **Supplementary Table 6. Different frequencies of haplotypes of *kdr* mutations in *Ae. aegypti* populations from Abidjan, southeastern Côte d’Ivoire** | | | | | | | | | |
| --- | --- | --- | --- | --- | --- | --- | --- | --- | --- |
| **Study site** | **Frequency of haplotypes** | | | | | | | | |
| **CIL** | **CIV** | **CVL** | **CVV** | **FIL** | **FIV** | **FVL** | **FVV** |
| Anono | 0,347 | 0,186 | 0,068 | 0,335 | 0,004 | 0,004 | 0 | 0,055 |
| Ayakro | 0,353 | 0,129 | 0,216 | 0,25 | 0 | 0 | 0,009 | 0,043 |
| Entente | 0,252 | 0,265 | 0,109 | 0,332 | 0 | 0 | 0 | 0,042 |
| Gbagba | 0,304 | 0,254 | 0,083 | 0,25 | 0 | 0 | 0,004 | 0,092 |
| **Total** | **0,314** | **0,209** | **0,118** | **0,282** | **0,001** | **0,001** | **0,005** | **0,059** |
| C, I and L are the mutated alleles of the F1534C, V1016I and V410L *kdr* mutation whilst F, V and V are the wilds alleles of the same mutations respectively | | | | | | | | | |
