# Supplementary material
Source: Research Square preprint supplement (doi:10.21203/rs.3.rs-9025253/v1)
Supplement: Supplementary file 5 [file 749e606d3ef7195e321f641b.docx]

| **Supplementary Table 2. Generalized linear model showing the *Aedes aegypti* mortality relationship between localities and insecticide**. | | | |
| --- | --- | --- | --- |
| Predictors | Odds | 95% CI | p |
| Intercept | 0.48 | 0.30 - 0.76 | 0.001 |
| **Locality [Anono]** |  |  |  |
| Ayakro | 0.54 | 0.27 - 1.10 | 0.088 |
| Entente | 0.61 | 0.30 - 1.21 | 0.153 |
| Gbagba | 0.84 | 0.43 -1.63 | 0.601 |
| **Insecticide [Deltamethrin]** |  |  |  |
| **Alphacypermethrin** | **0.17** | **0.06 - 0.43** | **<0.001** |
| **Bendiocarb** | **2.86** | **1.56 - 5.26** | **<0.001** |
| Permethrin | 0.65 | 0.33 - 1.28 | 0.211 |
| **Pirimiphos-methyl** | **9.46** | **4.65 - 19.24** | **<0.001** |
| **Locality [Anono] x Insecticide [Deltamethrin]** |  |  |  |
| **Ayakro x Alphacypermethrin** | **6.38** | **1.91 - 21.36** | **0.002** |
| **Entente x Alphacypermethrin** | **3.64** | **1.05 - 12.59** | **0.004** |
| **Gbagba x Alphacypermethrin** | **3.39** | **1.01 - 11.32** | **0.046** |
| **Ayakro x Bendiocarb** | **3.27** | **1.31 - 8.17** | **0.011** |
| **Entente x Bendiocarb** | **5.44** | **2.12 - 13.98** | **<0.001** |
| **Gbagba x Bendiocarb** | **4.54** | **1.77 - 11.06** | **0.001** |
| Ayakro x Permethrin | 1.66 | 0.60 - 4.56 | 0.326 |
| Entente x Permethrin | 0.57 | 0.19 - 1.75 | 0.327 |
| Gbagba x Permethrin | 0.86 | 0.31 - 2.34 | 0.762 |
| Ayakro x Pirimiphos-methyl | 0.75 | 0.28 - 2.00 | 0.565 |
| Entente x Pirimiphos-methyl | 0.54 | 0.21 - 1.42 | 0.212 |
| **Gbagba x Pirimiphos-methyl** | **0.26** | **0.10 - 0.67** | **0.005** |
| Reference factor levels of predictors are shown in brackets with the Odds Ratio, 95% confidence intervals (CI), and associated probabilities for predictors included in the model. Significant predictor terms are shown in bold**.** | | | |
