# Supplementary material
Source: Research Square preprint supplement (doi:10.21203/rs.3.rs-9025253/v1)
Supplement: Supplementary file 6 [file 792c41661ce2909c8178482e.docx]

| **Supplementary Table 5. Double mutant *kdr* genotypes in dead and alive *Ae. aegypti* mosquitoes in study sites** | | | | |
| --- | --- | --- | --- | --- |
| Sites | Phenotypes | CC/II | II/LL | CC/LL |
| n (%) | n (%) | n (%) |
| Anono | Alive | 16 (76,2) | 1 (100) | 2 (100) |
| Dead | 5 (23,8) | 0 (0) | 0 (0) |
| **Sub-total** | **21 (100)** | **1 (100)** | **2 (100)** |
| Ayakro | Alive | 11 (73,3) | 0 (0) | 24 (88,9) |
| Dead | 4 (26,7) | 0 (0) | 3 (11,1) |
| **Sub-total** | **15 (100)** | **0 (0)** | **27 (100)** |
| Entente | Alive | 23 (88,5) | 0 (0) | 11 (84,6) |
| Dead | 3 (11,5) | 0 (0) | 2 (15,4) |
| **Sub-total** | **26 (100)** | **0 (0)** | **13 (100)** |
| Gbagba | Alive | 20 (83,3) | 0 (0) | 9 (81,8) |
| Dead | 4 (16,7) | 0 (0) | 2 (18,2) |
| **Sub-total** | **24 (100)** | **0 (0)** | **11 (100)** |
| Overall | Alive | 70 (81,4) | 1 (100) | 46 (86,8) |
| Dead | 16 (18,6) | 0 (0) | 7 (13,2) |
| **Total** | **86 (100)** | **1 (100)** | **53 (100)** |
| n represents the number of mosquitoes, and % represents the percentage | | | | |
