# Supplementary material
Source: Research Square preprint supplement (doi:10.21203/rs.3.rs-9025253/v1)
Supplement: Supplementary file 7 [file bb6457fdff694067e59992a8.docx]

| **Supplementary Table 4. Summary Chi-square Test for Hardy-Weinberg Equilibrium** | | | | | |
| --- | --- | --- | --- | --- | --- |
| **Study area** | ***Kdr* mutation** | **df** | **ꭓ2** | **p-value** | **Significativity** |
| Anono | F1534C | 1 | 0.015 | 0.900 | ns |
| V1016I | 1 | 3.321 | 0.068 | ns |
| V410L | 1 | 2.588 | 0.107 | ns |
| Ayakro | F1534C | 1 | 0.125 | 0.722 | ns |
| V1016I | 1 | 0.635 | 0.421 | ns |
| V410L | 1 | 0.013 | 0.908 | ns |
| Entente | F1534C | 1 | 0.401 | 0.526 | ns |
| **V1016I** | **1** | **3.943** | **0.047** | ***** |
| V410L | 1 | 0.534 | 0.464 | ns |
| Gbagba | F1534C | 1 | 0.009 | 0.922 | ns |
| **V1016I** | **1** | **8.387** | **0.003** | ****** |
| V410L | 1 | 0.004 | 0.943 | ns |
| **ns=not significant, * p<0.05, ** p<0.01, *** p<0.001** | | | | | |
